# Supplementary material for: AstroComb(v.1.0): Non-linear, Multi-channel, Probabilistic Cyclostratigraphic Analysis
Source: Copernicus journal article supplement (doi:10.5194/egusphere-2025-6145), 2026-02-23
Supplement: Supplementary file [file egusphere-2025-6145-AC5-supplement.pdf]

# AstroComb: Non-linear, Multi-channel, Probabilistic Cyclostratigraphic Analysis

Iris Fernandes<sup>\*1</sup>, Klaus Mosegaard<sup>\*1</sup>, Aske L. Sørensen<sup>2</sup>, Mohammad  
Youssof<sup>1</sup>, Nicolas Thibault<sup>2</sup>, and Tais W. Dahl<sup>2</sup>

<sup>1</sup>Niels Bohr Institute, University of Copenhagen, Denmark

<sup>2</sup>Department of Geosciences and Natural Resource Management, University  
of Copenhagen, Denmark

## Abstract

We present a new algorithm for constructing floating astronomical timescales with explicit uncertainty estimates from sedimentary sequences. The method integrates probabilistic spectral analysis with inverse geochronological modeling, applied to ultra-high-resolution, multiproxy datasets such as core scanning X-Ray Fluorescence (XRF) elemental records. Our framework does not smooth data or impose layer-to-layer dependency, allowing sedimentation rates to vary abruptly at short stratigraphic length scales. By detecting and statistically constraining Milankovitch cycles preserved in stratigraphic signals, the algorithm seeks a floating age-depth model that reconstructs geological time and can be anchored to deliver absolute age assignment, when astronomical tie points and/or radiometric ages are available. The resulting timescales enable precise, uncertainty-bounded timing of biostratigraphic zones, geochemical events, and depositional cycles. This approach advances astrochronology by combining cycle detection with formal stratigraphic modelling, while preserving fine-scale depositional variability, offering a reproducible and statistically rigorous framework for dating deep-time records.

## 1 Introduction

Astronomical forcing of Earth's climate system produces quasi-periodic variations in sedimentary records that can be used to construct geological timescales, reconstruct daylength, Earth system evolution, and investigate the long-term dynamics of the Solar System (Hinnov et al., 2013 and references therein). Astrochronology has therefore become a central component of modern geochronology and is now widely used in calibration of the Geological Timescale (Laskar, 2020), reconstruction of past climate variability (Hays et al., 1976; Pälike

---

\*Corresponding authors: iris@nbi.ku.dk, mosegaard@nbi.ku.dk

31 et al., 2006), and studies of Earth–Moon distance and Solar System evolution (Ma et al.,  
32 2017; Meyers and Malinverno, 2018; Zhou et al., 2024). Improvements in astrochronolog-  
33 ical methodologies therefore have implications extending beyond stratigraphy, influencing  
34 multiple areas of geoscience and planetary science.

35 The fundamental challenge in astrochronology is that sedimentary records preserve orbital  
36 forcing only indirectly. Variability in sedimentation rates, changes in depositional environ-  
37 ments, diagenetic overprinting, and nonlinear sedimentary responses distort the astronomical  
38 signals. Furthermore, in deep-time studies beyond approximately 50–60 Ma, where theoret-  
39 ical orbital solutions become unreliable due to the chaotic evolution of the Solar System  
40 (Laskar et al., 2004, 2011). As a result, astrochronology requires inverse methods that infer  
41 sedimentation histories and test consistency with orbital forcing.

42 Over the past two decades, several classes of inverse astrochronologic methods have been  
43 developed to address this problem. Early methods, such as Average Spectral Misfit (ASM)  
44 evaluates spectral peaks against astronomical frequencies across sedimentation rates and was  
45 later extended to moving-window analysis (eASM; Meyers and Sageman 2007).

46 Bayesian spectral methods later formalized this framework by evaluating the power con-  
47 centrated in astronomical frequencies relative to a noise model formulated as a likelihood  
48 function (Malinverno et al., 2010; Peng et al., 2023; Trayler et al., 2024). Parallel devel-  
49 opments introduced time-domain approaches including TimeOpt (Meyers, 2015) and time-  
50 variant sinusoidal modeling (Sinnesael et al., 2016; ACE v. 1) along with extensions (Sinnesael  
51 et al., 2018; Meyers and Malinverno, 2018; Malinverno and Meyers, 2024; Hoang et al., 2025),  
52 while correlation-based methods such as COCO and eCOCO evaluated agreement between mea-  
53 sured and theoretical power spectra (Li et al., 2018). More recently, AstroGeoFit has intro-  
54 duced a unified, uncertainty-aware framework that jointly optimizes sedimentation rates and  
55 astronomical tuning, enabling rigorous error estimation in age–depth models (Hoang et al.,  
56 2025). Together these methods have substantially advanced quantitative astrochronology  
57 and uncertainty assessment.

58 Sedimentation is an inherently unsteady and discrete process, influenced by short-lived  
59 hiatuses and implicit erosion that result in nonlinear time–depth relationships across all time  
60 scales (Kemp and Sexton, 2014). Mass accumulation is affected by deposited grains and dia-  
61 genetic processes inside the sediments, including cementation, authigenic mineral formation  
62 and recrystallization. Milankovitch insolation forcing may influence deposited grains as well  
63 as diagenetic products. The sediment composition is also affected by other cyclic processes,  
64 for example biogeochemical resonances and local autogenic deposition processes (Zhao et al.,  
65 2023; Paola, 2016; Munnecke et al., 2001). These processes may introduce abrupt local vari-  
66 ations in mass accumulation rates that are difficult to capture using approaches that assume  
67 smoothly varying sedimentation. In the following, we use “sedimentation rates” to refer  
68 broadly to all mass-accumulation rates in a sedimentary drill core.

69 We introduce **AstroComb** —a probabilistic framework for combing multi-channel geo-  
70 chemical records to identify signatures of astronomical periodicities. The goal is to construct  
71 floating astronomical timescales and to estimate sedimentation rates within stratigraphic  
72 sections while explicitly quantifying the associated uncertainties. Conceptually, AstroComb  
73 builds on the Bayesian spectral inversion approach of (Malinverno et al., 2010) but extends  
74 it in several important ways.

75 First, the method simultaneously incorporates multiple observational channels, allowing

76 information from independent geochemical proxies to constrain sedimentation-rate estimates.  
77 Second, the method allows abrupt local variations in sedimentation rate where supported by  
78 the data. Third, the framework explicitly quantifies uncertainty by estimating full posterior  
79 probability distributions for sedimentation rates at every stratigraphic position. The current  
80 version of **AstroComb** looks for multiple periodic signals with the correct relative periods  
81 for selected astronomical insolation forcings, and is currently not designed to independently  
82 validate whether such fit is indeed driven by insolation variations, e.g. by seeing eccentricity-  
83 driven amplitude modulations on precession and/or obliquity cycles.

84 The **AstroComb** method operates through a sliding-window probabilistic inversion in  
85 which observed local spectra are compared with target astronomical frequencies under a  
86 range of candidate sedimentation rates. The resulting posterior distributions provide esti-  
87 mates of sedimentation rates, uncertainty, and information content as a function of strati-  
88 graphic depth.

89 We evaluate the performance of **AstroComb** first by using synthetic datasets designed  
90 to test the recovery of abrupt sedimentation-rate changes under substantial noise contami-  
91 nation. Then, we apply **AstroComb** to ultra-high-resolution X-ray fluorescence (XRF) data  
92 from the upper Cambrian Alum Shale Formation of Scandinavia. The Alum Shale represents  
93 an ideal test case because of its preservation of orbital-scale cyclicity (Sørensen et al., 2020;  
94 Zhao et al., 2022). Using approximately 90,000 measurements spanning  $\sim 19$  m of stratig-  
95 raphy, we evaluate whether probabilistic multi-channel analysis can recover orbitally forced  
96 signals while recovering variability in sedimentation rates.

## 97 2 Theory and Methods

### 98 2.1 Overview

99 The goal of this study is to reconstruct a *locally varying sedimentation rate profile with error-*  
100 *bars* from multiple geochemical depth series, under the assumption that certain stratigraphic  
101 signals (e.g., elemental variability) reflect astronomical forcing. We achieve this by inverting  
102 a forward model of signal distortion under varying sedimentation, using a formulation rooted  
103 in probabilistic inversion.

104 This method builds upon the principles of astrochronology, particularly the spectral iden-  
105 tification of Milankovitch-band periodicities in sedimentary records, but extends them to  
106 allow for *instantaneous, non-stationary* sedimentation rates. **AstroComb** performs a sliding-  
107 window probabilistic fit of observed geochemical spectra to a predefined target astronomical  
108 spectrum, yielding a sedimentation rate for the mid-point in the window that optimally  
109 “stretches” or “compresses” the time axis at each position to recover astronomical frequen-  
110 cies. The fit is performed in frequency domain, which allows multi-channel (e.g. multiple  
111 elements) that will not be obscured if displaced by a phase-lag.

112 We begin by formalizing the relationship between sedimentation rate and spectral dis-  
113 tortion, then describe the inversion procedure and implementation of **AstroComb**. Finally,  
114 as an example, we discuss its application to the Alum Shale data and compare to previous  
115 cyclostratigraphic results (Sørensen et al., 2020).

## 116 2.2 Forward Model of Spectral Distortion

117 Let  $d(z)$  be a geochemical depth series (e.g., Al concentrations), where  $z$  is stratigraphic  
 118 depth. If sediment accumulated at a locally constant rate,  $r(z) = \frac{dz}{dt}$ , then in the time  
 119 domain, the corresponding series is  $d(t)$ . However, in practice we only observe the signal in  
 120 the depth domain.

121 Let  $k$  be a frequency in the depth domain (wave number in cycles per mm) and  $f$  its  
 122 time-domain counterpart (cycles per ky). The transformation between the two is:

$$k = \frac{f}{r} \quad (1)$$

123 Thus, a fixed astronomical frequency  $f$  will appear in the stratigraphic record as a peak at  
 124  $k$ , depending on the local sedimentation rate. Variations in  $r(z)$  distort the signal, shifting,  
 125 splitting, or smearing spectral peaks (Schiffelbein and Dorman, 1986; Ripepe and Fischer,  
 126 1991; Herbert, 1994; Meyers et al., 2001). Our objective is to recover  $r(z)$  such that the  
 127 observed power spectrum matches that predicted from astronomical forcing (see Figure 1).

## 128 2.3 Computing the Likelihood of a Sedimentation Rate

129 For a given depth interval (window) centered at  $z_0$ , we obtain power spectra  $\mathbf{D}_{obs}$  of multiple,  
 130 observed signals ( $\mathbf{D}_{obs}$  is a matrix of spectra with a spectrum of one channel in each column).  
 131 For each trial sedimentation rate  $r$ , we convert the target time-domain frequencies  $f$  to  
 132 expected depth-domain frequencies (wave numbers)  $k = f/r$  and compute *synthetic spectra*

$$\mathbf{G}(r, \mathbf{a}) = \sum_{m=1}^M a_m \mathbf{w} \left( \frac{f_m}{r} \right) \quad (2)$$

133 where  $\mathbf{G}(r, \mathbf{a})$  is a matrix of synthetic data spectra (a copy of the spectrum in each column),  
 134  $f_m$  is the  $m$ 'th Milankovitch frequency (assumed known), and  $\mathbf{w}(\frac{f_m}{r})$  and  $\mathbf{a}$  are vectors  
 135 with the shape of the spectral lines, centered at  $\frac{f_m}{r}$ , and the corresponding amplitudes,  
 136 respectively. The shape  $\mathbf{w}$  can be computed as the discrete Fourier transform of a discretized  
 137 delta function with the same length as the window.

138 From the synthetic spectra  $\mathbf{G}(r, \mathbf{a})$  and the matrix of observation spectra  $\mathbf{D}_{obs}$  we can  
 139 now calculate the likelihood as the probability of data, given the sedimentation rate  $r$  and  
 140 the spectral peak amplitudes  $\mathbf{a}$ :

$$L(r, \mathbf{a}) = P(\mathbf{D}_{obs} | (r, \mathbf{a})). \quad (3)$$

141 In our computation of the likelihood, data uncertainties are provided by the user as the  
 142 probability that a peak in the observed spectrum is a Milankovitch peak. Existing data-  
 143 fitting-based methods (Meyers and Sageman 2007, Malinverno et al. 2010; TimeOpt: Meyers  
 144 2015; TimeOptMCMC: Meyers and Malinverno 2018; AstroGeoFit: Hoang et al. 2025) are  
 145 purely based on misfits between data (elemental records) and synthetic signals (generated  
 146 from assumed Milankovitch periods), but AstroComb is instead aimed at simulating the data  
 147 uncertainty evaluation carried out by practitioners analyzing observational data. In tradi-  
 148 tional misfit calculations you not only need experimental uncertainties, but also components

149 of the data that are not modeled by the Milankovitch cycles. The latter are significant, but  
 150 not directly available (for example, The TimeOptMCMC algorithm estimates them through  
 151 a Hierarchical Bayes approach (Meyers and Malinverno, 2018). However, in our approach  
 152 we are automatically taking all data uncertainty sources into account, including the practi-  
 153 tioner’s confidence in identifying spectral peaks.

154 The most (almost universally adopted) definition of the likelihood is

$$L(\mathbf{m}) = p_n(\mathbf{d}_{obs} - g(\mathbf{m})) , \quad (4)$$

155 where  $p_n$  is the noise distribution,  $\mathbf{d}_{obs}$  is the observed data, and  $g(\mathbf{m})$  is the forward function  
 156 mapping the unknown model parameters  $\mathbf{m}$  into the data. We can see from equation 4 that  
 157 the likelihood depends on  $\mathbf{m}$  through the function  $g$ , so we can define a function  $p_d$  such that

$$p_d(g(\mathbf{m})) \equiv L(\mathbf{m}). \quad (5)$$

158 Since  $g(\mathbf{m})$  is the “noise-free data”, we can view  $p_d$  as the (possibly unnormalized) distri-  
 159 bution of the noise-free data, given that we only know the observations  $\mathbf{d}_{obs}$  and the data  
 160 uncertainties  $p_n$ . However, definition 5 also shows that a likelihood can be calculated by any  
 161 procedure that measures the goodness of fit, based on a forward function  $g$  and observations  
 162  $\mathbf{d}_{obs}$ . The underlying uncertainty need not be given in advance through a noise distribution  
 163  $p_n$ . If the goodness of fit is *a priori* acceptable for the analyst (e.g., based on experience),  
 164  $p_n$  can be determined afterwards, if needed. In the following we follow a procedure where  
 165 we define the likelihood without an initial definition of  $p_n$ .

166 Our likelihood calculation is as follows:

- 167 1. As prior information about the data uncertainties, we mimic the ‘manual’ process  
 168 of spectral line identification by defining a probability that there is a potential Mi-  
 169 lankovitch peak at a given wavenumber  $k$  in the spectrum. Between user-defined lower  
 170 and upper bounds  $a$  (the lower limit for being identified as a ”peak”) and  $b$  (the value  
 171 above which we are sure that we have found a potential peak), the probability increases  
 172 from a user defined, small positive number  $p_a$  at the lower limit to  $p_b = 1 - p_a$  at the  
 173 upper limit. Typical values are  $a = \langle F \rangle + \sigma_F$  and  $b = \langle F \rangle + 3\sigma_F$ , where  $\langle F \rangle$  is a  
 174 local mean of the spectrum around the considered wavenumber  $k$  over an interval of  
 175 length 1, and  $\sigma_F$  is the local standard deviation of the spectrum. A typical value of the  
 176 threshold probability  $p_a$  is 0.01. The probability is chosen as a smooth, monotonically  
 177 increasing sigmoid function  $p(x)$  satisfying

$$p(a) = p_a, \quad p_b(b) = 1 - p_a, \quad (6)$$

178 with the constraints

$$b > a, \quad 0 < p_a < 0.5. \quad (7)$$

179 We adopt the logistic sigmoid form

$$p(x) = \frac{1}{1 + \exp(-k(x - x_0))} \quad (8)$$

180 with

$$x_0 = \frac{a + b}{2}. \quad (9)$$

181 2. For each layer (which is  $\Delta z = 0.2$  mm thickness in the Fågeltofta-2 core), we evaluate  
 182 the likelihood in a grid of sedimentation rates  $r$  with typical grid spacing  $\Delta r = 0.02$   
 183 mm/ky. Each possible choice corresponds to given locations of the Milankovitch cycles  
 184 in the spectrum, and for each location at  $k_i$  with spectral amplitude  $a_i$ , we evaluate  
 185 the probability  $p(k_i, a_i)$ . Finally, the likelihood of the considered sedimentation rate  $\mathbf{r}$   
 186 is computed as the product

$$L(\mathbf{r}) = \prod_{i=1}^{I_M} p(k_i, a_i), \quad (10)$$

187 where  $I_M$  is the number of Milankovitch cycles considered. For example, when several  
 188 records of major element concentrations are used in the calculation, the combined  
 189 likelihood for all records is computed as the product of the individual likelihoods.  
 190 That is, we can assume channels are independent of each other.

## 191 2.4 The Posterior Probabilities of Sedimentation Rates

192 If prior information about  $(r, \mathbf{a})$  is encoded by a probability density  $\rho(r, \mathbf{a})$  we can - in a  
 193 Bayesian formulation - express the complete, probabilistic solution as a *posterior* probability  
 194 density

$$p(r, \mathbf{a}) = C \cdot L(r, \mathbf{a}) \rho(r, \mathbf{a}). \quad (11)$$

195 where  $C$  is a proportionality constant. In the example below, where data from Fågeltofta-2  
 196 is analyzed, the prior assigns constant values to all sedimentation rates within user-defined  
 197 boundaries of  $1.0 \text{ mm/ky} < r < 10.0 \text{ mm/ky}$ .

198 From the marginal sedimentation rate distribution

$$p(r) = \int p(r, \mathbf{a}) da \quad (12)$$

199 at each stratigraphic position, we can now compute a floating geological time,  $t$ , and its  
 200 uncertainties as a function of depth,  $z$ . If the absolute time,  $t_0$ , is known at a given depth  
 201  $z_0$ , and the sedimentation rate in layer  $n$  is  $r_n$ , the time at  $z_0 + N\Delta z$  is

$$t(z_0 + N\Delta z) = t_0 + \Delta z \sum_{n=1}^N \frac{1}{r_n}. \quad (13)$$

202 From the posterior probability densities of the sedimentation rates  $r_n$ , and hence  $\Delta z/r_n$ , we  
 203 can now calculate the uncertainties of the times,  $t$ . From the variances of the distributions  
 204 of  $\Delta z/r_n$  for all layers  $n$ , we can obtain the variance of  $t(z_0 + N\Delta z)$  by a simple summation:

$$\text{Var}(t(z_0 + N\Delta z)) = \sum_{n=1}^N \text{Var} \left( \frac{\Delta z}{r_n} \right). \quad (14)$$

205 Working with variances, instead of the full probability distributions for the inverse sedimen-  
 206 tation rates, saves computer storage and time when processing large data sets. Furthermore,  
 207 due to the central limit theorem, the distribution of the sum of random time increments

208 will converge to a Gaussian distribution when the number of layers increases, making the  
 209 variance an adequate description of the uncertainty.

210 Finally, we calculate the Kullback-Leibler information measure at each depth  $z$  showing  
 211 how much Milankovitch information is present in the data as a function of depth (Kullback  
 212 and Leibler, 1951). This is obtained from:

$$\mathcal{I} = \int_R p_z(r) \ln \left( \frac{p_z(r)}{u(r)} \right) dr \quad (15)$$

213 where  $p_z(r)$  is the calculated probability distribution of  $r$  at depth  $z$ ,  $R$  is the range of sed-  
 214 imentation rates, and  $u(r)$  is a uniform (constant, and hence non-informative) distribution.  
 215 Theoretically, the Kullback-Leibler information measures the expected number of yes/no  
 216 questions needed to update our state of information from what is given by  $u(r)$  (here total  
 217 ignorance) to what is given by  $p_z(r)$  (here, the posterior distribution).

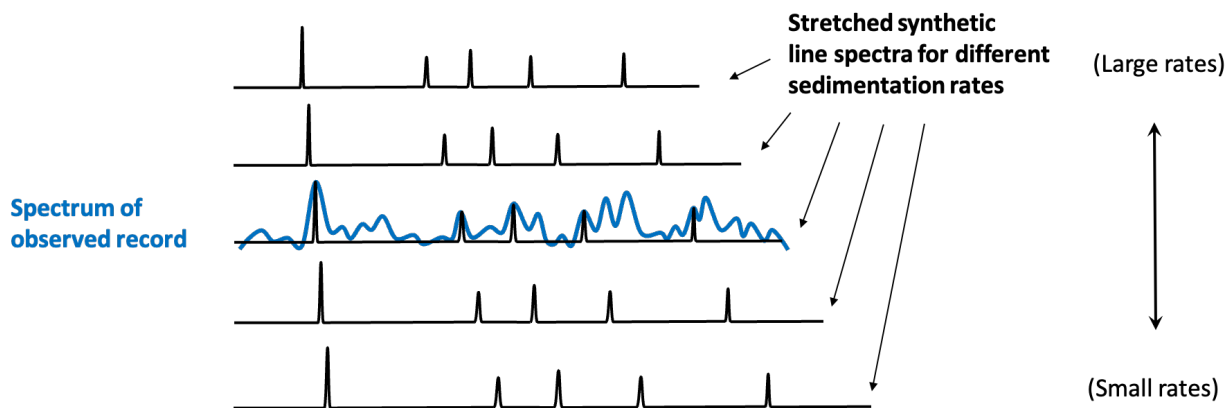

Figure 1: Schematic overview of the likelihood calculation for fitting Milankovitch cycles in elemental profiles. The spectrum of the observed geochemical signal (e.g., Al content) is compared against a theoretical line spectrum, composed of known astronomical frequencies, and stretched according to the sedimentation rate. The likelihood of each assumed sedimentation rate is computed from the probabilities that amplitudes at line locations are significant peaks. This process yields probability distributions of sedimentation rates as a function of depth, and allows an age–depth model consistent with Milankovitch forcing to be computed.

## 218 2.5 The AstroComb Algorithm

219 ASTROCOMB implements the above approach through the following steps:

- 220 1. **Preprocessing:** Detrend and normalise the depth series, optionally re-sample or  
 221 smooth.
- 222 2. **Sliding Window:** For each depth window (an interval with length, e.g., 2–4 m chosen  
 223 by the user), compute the local power spectrum.

- 224 3. **Spectral Inversion:** Fit the observed spectrum to the target astronomical model.  
 225 (The user defines the number of relevant Milankovitch periods). Based on spectral peak  
 226 identification (the threshold of which is defined by the user), estimate the posterior  
 227 probability distribution of the sedimentation rate.
- 228 4. **Output:** Store the sedimentation rate  $r(z)$  and its posterior probability distribution  
 229 for the window.
- 230 Steps 1-4 in our calculation is accompanied by an uncertainty estimate. For each  
 231 position of the sliding data window, the algorithm automatically estimates the part  
 232 of the signal that cannot be attributed to Milankovitch forcing (see the likelihood  
 233 calculation above).
- 234 5. **Construction of (floating) age-model:** Calculate geological time from sedimenta-  
 235 tion rates and stratigraphic thickness. Also, an age-depth model is derived when the  
 236 user defines an age-depth anchor.

## 237 2.6 Target Astronomical Spectrum

238 Because no closed form astronomical solution exists beyond about 50 Ma (Laskar et al.,  
 239 2011, 2004), we ignore the relative phases and adopt theoretical periods constructed from  
 240 studies of deep-time orbital mechanics (Farhat et al., 2022; Waltham, 2015). For the upper  
 241 Cambrian  $\sim 497$  Ma, the target includes:

- 242 • Long eccentricity: 405 ky
- 243 • Short eccentricity: 99 ky
- 244 • Obliquity: 32.4 ky
- 245 • Precession: 19.5 ky

246 We encode these as 4 sinusoids with known periods (without uncertainties). We do not define  
 247 their expected spectral power ratios based on orbital modulation transfer, since the Earth's  
 248 climate and environmental response to the Milankovitch forcing modifies these ratios in an  
 249 unknown way.

## 250 3 Results

### 251 3.1 Synthetic data: dealing with discontinuous sedimentation rates

252 A test on synthetic data was carried out to study the accuracy and stability of the algorithm.  
 253 More importantly, this allows us to validate whether we can reproduce a known sedimentation  
 254 rate profile using a known target astronomical spectrum.

255 A severe test with artificial data forced by a sinusoidal Cambrian Milankovitch forcing  
 256 overlain by 200% red noise and showing significant sedimentation rate discontinuities, was  
 257 carried out (figure 2). The synthetic data were calculated from eq. 2 using approximate

258 Cambrian Milankovic frequencies  $f_m = 1/T_m$  where  $T_m = 405, 95, 124, 41, 25.7, 112, 100$  (all  
259 in ky), and with all amplitudes  $a_m$  set to 1. The synthetic sedimentation rate model (figure  
260 3) is characterized by layers with sedimentation rates separated by significant discontinuities  
261 which could reflect abrupt changes in the climate such as going from coarse grained quartz  
262 sand to fine-grained mudrock and/or a pause in sedimentation (hiatus) that may also leave a  
263 geochemical imprint on the XRF data. From this model, the synthetic data were calculated  
264 (figure 3). The 200% noise was red noise with a  $1/f^2$  power spectral density, simulating a  
265 background spectrum of geological signal that cannot be explained as astronomical forcing.  
266 Figure 3 shows the posterior probability densities of sedimentation rates for all depths,  
267 computed by **AstroComb** using the synthetic data. The true result (the synthetic reference  
268 model) is overlain to show the fidelity of the reconstruction.

269 Considering the relatively high noise level, the reconstruction of the true sedimentation  
270 rates is excellent. Abrupt changes in the sedimentation rate of about a factor three occur  
271 at 70, 74, 81, and 83 m, all of which are accurately captured by the **AstroComb** algorithm  
272 (figure 3). Sedimentation rates are not "smoothened", but the timing of the abrupt change  
273 appears uncertain.

274 However, the test also illustrates how the probability distribution outside the correct  
275 sedimentation rate is not invariable or zero. In fact, artifacts (mathematically possible,  
276 but incorrect sedimentation rates) are introduced by the noise, the variability of the true  
277 model, window size, and the non-linearity of the problem. Some of these artifacts show up  
278 as spurious parallel features that could potentially be misinterpreted as representing true  
279 sedimentation rates. This highlights a key challenge in cyclostratigraphic analyses: a given  
280 cycle may be interpreted as corresponding to different target periods, resulting in a mul-  
281 timodal sedimentation-rate probability distribution. Nevertheless, the highest probability  
282 remains associated with the true reference model (figure 3). The Kuhlback-Leibner infor-  
283 mation content varies along stratigraphic depth with high information content at intervals  
284 where the sedimentation rate is constant across the window size (3.3 m) and low where the  
285 sedimentation rate changes within the window. In any case, we note that the algorithm  
286 identifies the true (reference) sedimentation rates despite the high noise level, and that it  
287 reconstructs the large discontinuities between layers of constant rates quite well, with lower  
288 probability near abrupt sedimentation rate changes.

289 This study demonstrates that the **AstroComb** method extends the spectral misfit min-  
290 imization strategy in a probabilistic framework, handling uncertainty propagation and pa-  
291 rameter tuning with statistical rigor.

## 292 **3.2 Real world data from the late Cambrian Alum Shale Forma-** 293 **tion**

294 To illustrate the application of the multichannel, probabilistic Milankovitch period detector,  
295 **AstroComb**, we analysed high-resolution XRF data from a ~21-meter long interval (67.2520  
296 m - 88.0744 m) of the Fågeltafta-2 drill core through the Alum Shale Formation in southern  
297 Sweden obtained by [Sørensen et al. \(2020\)](#). Briefly, the XRF data was collected using an  
298 ITRAX core scanner from Cox Laboratories with 30 kV voltage and 50 mA current on a  
299 Rh tube. The XRF measurements were collected with a high scanning resolution of 0.2 mm

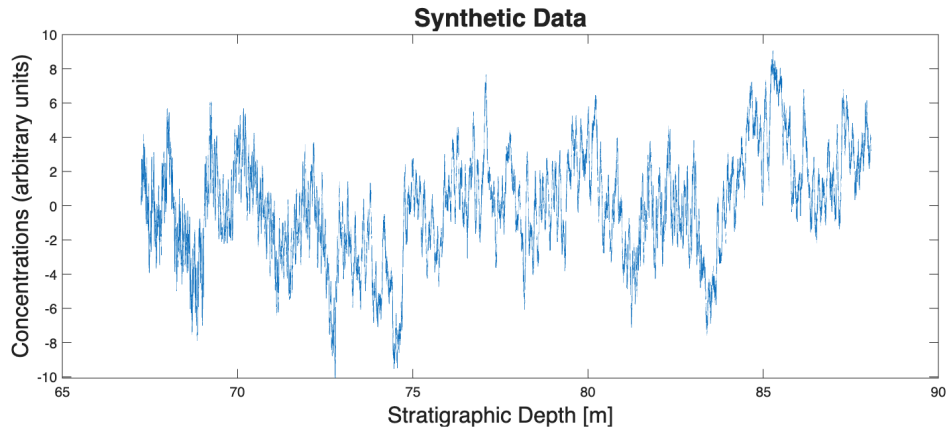

Figure 2: Synthetic data with 200% red noise used to test of the algorithm.

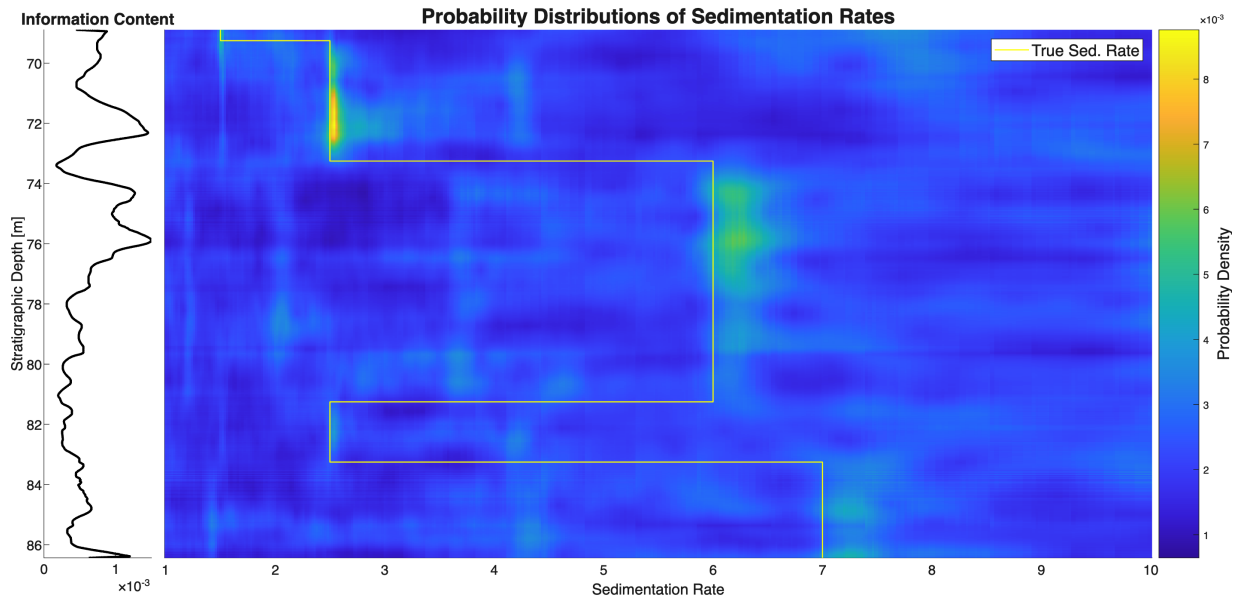

Figure 3: Probability density distributions of sedimentation rates computed from synthetic data with 200% red noise. The synthetic reference model is overlain to illustrate the fidelity of the reconstruction. Visually, the reconstructed sedimentation rates closely reproduce the true reference model. However, the results also demonstrate that noise, together with ambiguity in assigning a given cycle to different target periods, can introduce artifacts and lead to multimodal sedimentation-rate probability distributions for a given depth.

300 along the core and relatively long exposure time (7 sec/scan), producing signal reported as  
301 concentrations for 22 elements, incl.  $\text{Al}_2\text{O}_3$ ,  $\text{SiO}_2$ , S,  $\text{K}_2\text{O}$ , CaO,  $\text{TiO}_2$ , V, MnO,  $\text{Fe}_2\text{O}_3$ , Ni,  
302 Cu, Zn, Ge, As, Rb, Sr, Y, Zr, Mo, Ba, Hf, and U. This extensive elemental dataset formed  
303 the basis for the spectral analysis. Figure 4 shows a subset (the top 40 mm) of the data from  
304  $\sim 19$  m of core, yielding  $\sim 90,000$  measurements.

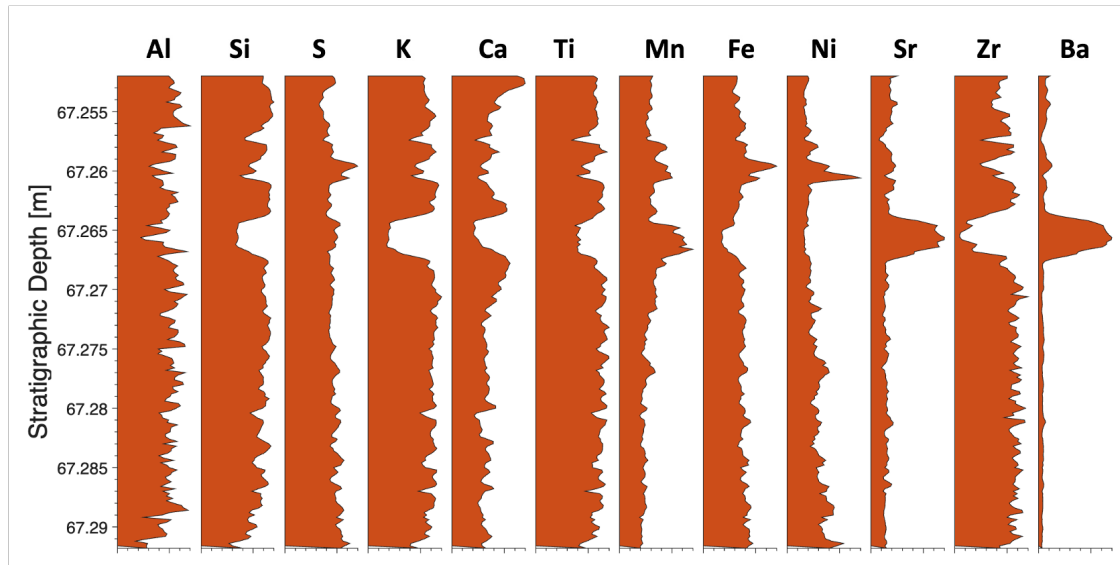

Figure 4: A selection of concentration profiles of the Fågeltofta-2 core, measured via XRF core scanning at 0.2 mm resolution. The records are all normalized to have the same maximum amplitude in the plot. The dataset spans approximately 19 meters of stratigraphy and comprises  $\sim 90,000$  individual measurements. Several profiles show well-developed quasi-periodic oscillations, which serve as the primary proxy for detecting orbitally forced sedimentary cycles in the subsequent astrochronological analysis.

### 305 3.2.1 Using one channel

306 We selected Al as the primary input because of its robustness as a proxy for detrital input  
307 and its strong spectral structure in preliminary analysis (Sørensen et al., 2020; Zhao et al.,  
308 2022). The depth series was detrended with a linear function. ASTROCOMB was run using  
309 a window length of 3.3 m, stepped every 0.2 mm.

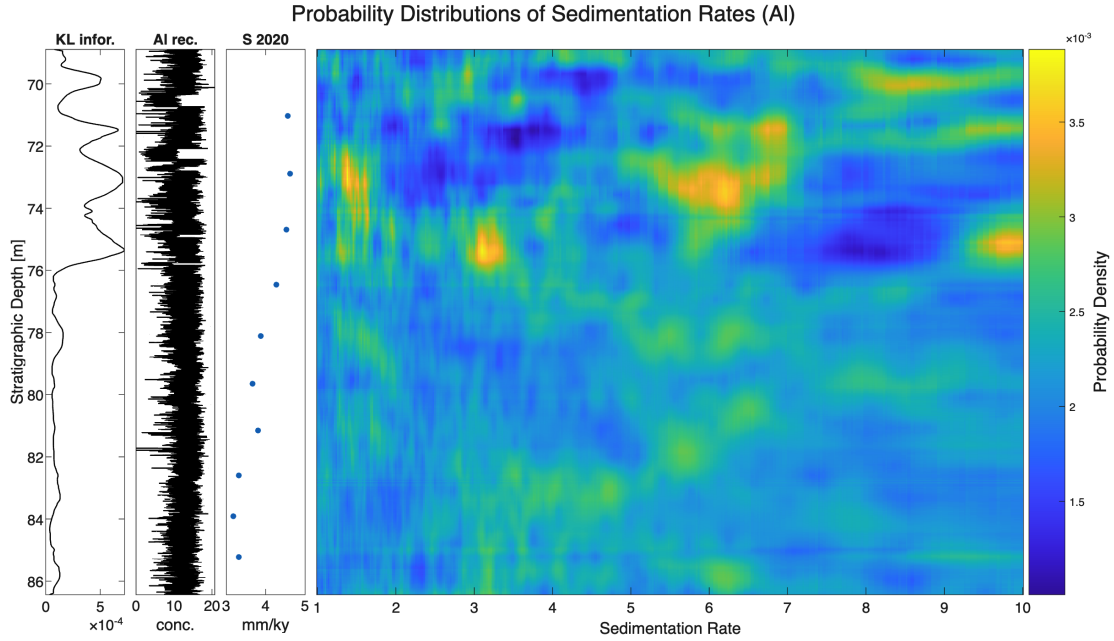

Figure 5: Sedimentation rate probability distribution for the Fågeltofta-2 core based on the Al record. The information content about Milankovitch cycles contained in the XRF data is quantified by the Kullback-Leibler measure.

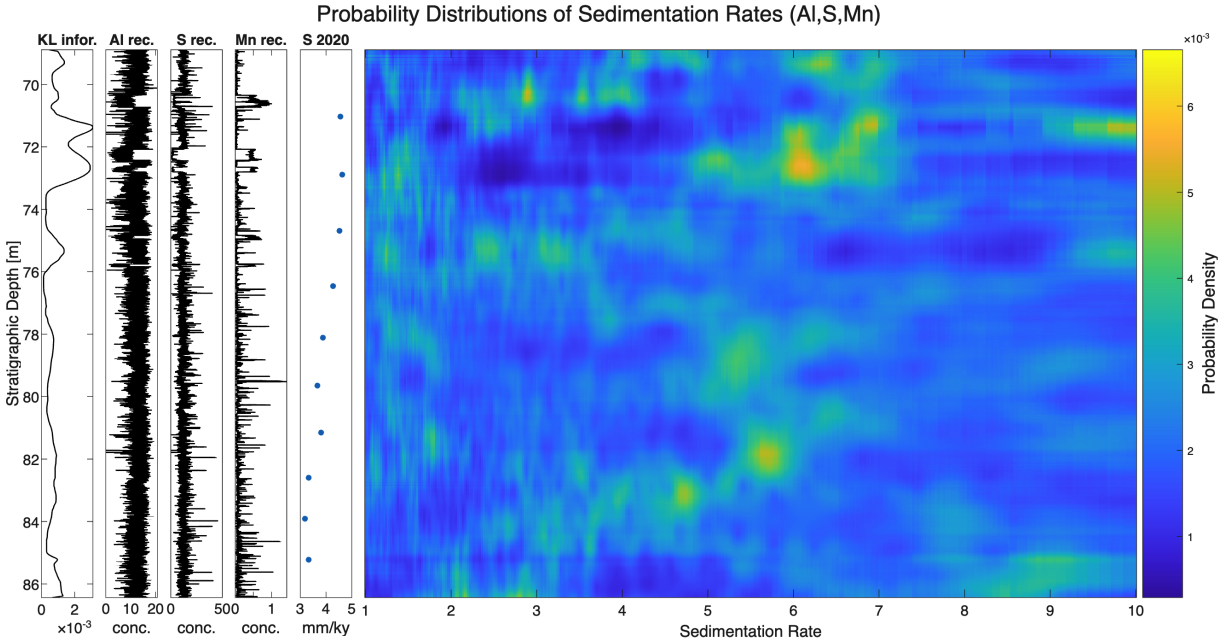

Figure 6: Probabilistic analysis of sedimentation rates in the Fågeltofta-2 core, based on simultaneous processing of S, Al, and Mn. Comparing to figure 5 it is clear that this multi-channel analysis has provided a higher resolution with more distinct peaks in the probability densities.

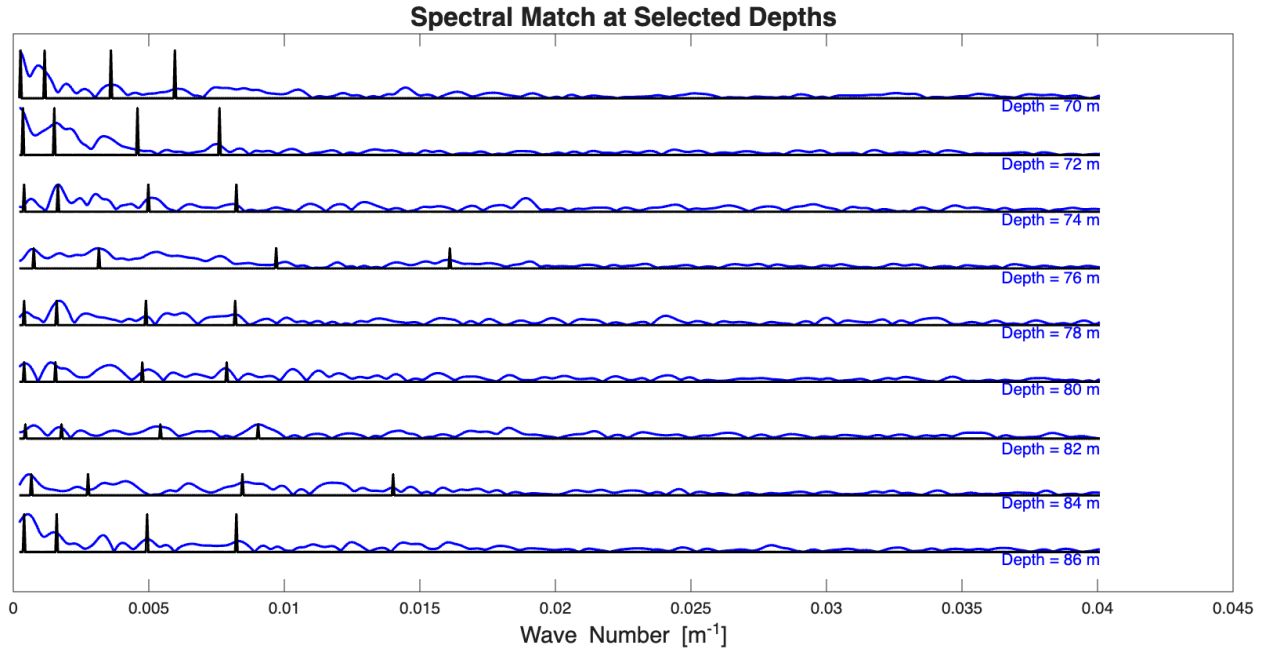

Figure 7: Spectral match at selected stratigraphic depths in the Fågeltofta-2 core. For every 2 m, the spectral lines corresponding to the best Milankovitch match are plotted (black) together with spectra of the Al content (blue) observed in windows centered at the depth.

310 The bulk sedimentation rate was *a priori* found within a range of realistic sedimentation  
 311 rates from 1.0 to 10.0 mm/ky. As output, we show the a posteriori probability distribution  
 312 of the sedimentation rates versus stratigraphic depth (figure 5), and selected spectral fits for  
 313 each 2 m in the core (figure 7). The Kullback–Leibler information measure at each depth  
 314  $z$  indicates that the Al record above 76 m contains a stronger Milankovitch signal than the  
 315 deeper intervals of the core. This corresponds to an approximately fourfold improvement  
 316 in the fit between the data and the target spectrum above 76 m. Overall, figure 5 suggests  
 317 that Milankovitch cyclicity is present throughout the core, as indicated by the non-zero  
 318 information content, while sedimentation rates appear to vary across the section.

319 From the estimated sedimentation rates, a Milankovitch timescale and its uncertainty  
 320 was derived (Figure 8), using the age of 496.595 Ma, consistent with Sørensen et al. (2020),  
 321 at a stratigraphic depth of 86.005 m as a reference.

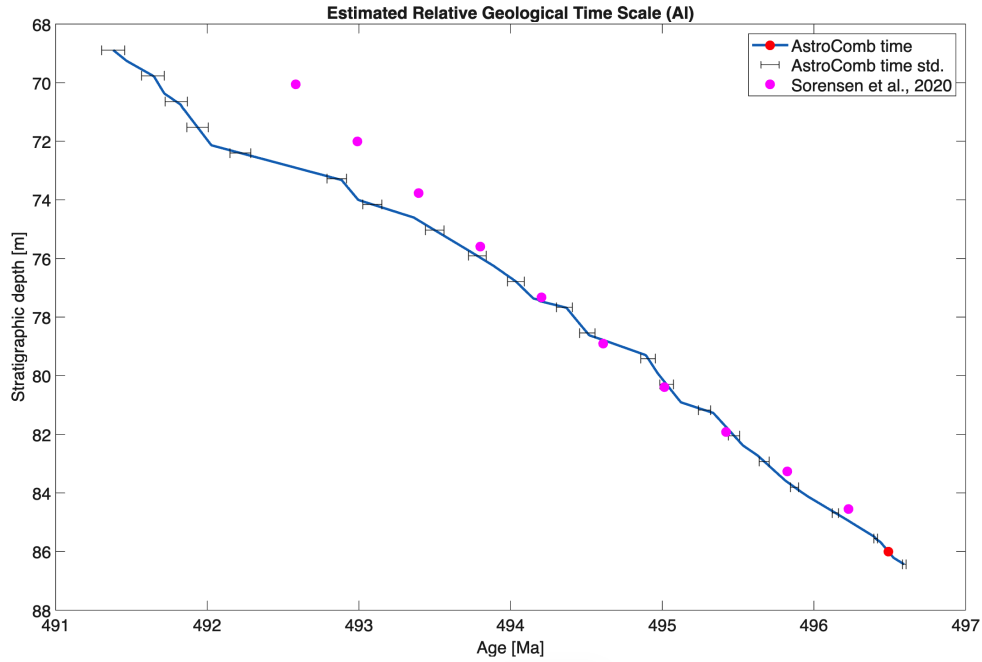

Figure 8: Estimated geological timescale and its uncertainty (standard deviations), based on probabilistic estimation of instantaneous sedimentation rates from the Al record in the Fågeltofta-2 core. The timescale is anchored at 86.005 m, corresponding to 496,595 ky (Sørensen et al., 2020). This anchor is marked with a red circle on the graph.

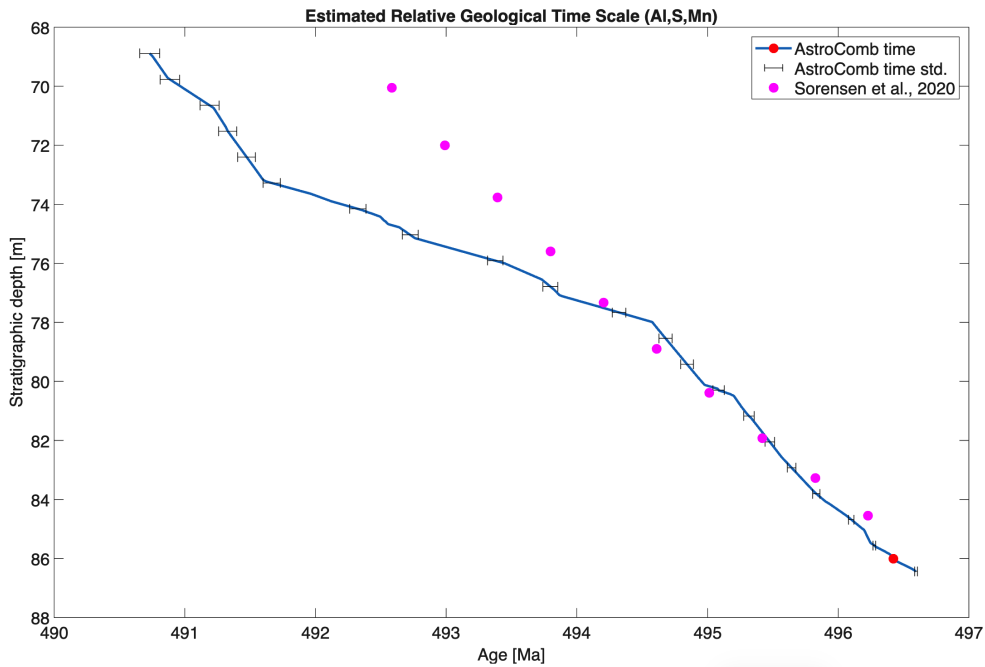

Figure 9: Relative timescale computed from the multi-channel data with records of S, Al and Mn.

322 This timescale enables the estimation of relative geological ages across the core, and  
323 allows depth-indexed chemical data to be analysed in the temporal domain, significantly  
324 enhancing our ability to interpret environmental transitions over geological timescales.

### 325 3.2.2 Using multiple channels

326 To demonstrate the capability of AstroComb for multichannel analysis, we applied the algo-  
327 rithm simultaneously to the S, Al, and Mn records. A central requirement in multichannel  
328 cyclostratigraphy is that the selected elemental channels provide independent information.

329 Often elements or element ratios are used as channels. Yet, XRF elements also covary  
330 because they share mineral hosts, are affected by dilution, or are linked through mathe-  
331 matical relationships, and such covariance can create a misleading impression of increased  
332 certainty rather than reflecting independent signals of Milankovitch forcing. For this rea-  
333 son, it is important to choose elements that are not cohosted, not simple dilutions of one  
334 another, and not strongly coupled, a choice that relies on expert knowledge of mineralogy  
335 and geochemistry. Al, S, and Mn meet these criteria in the Alum Shale. Although Al and  
336 S often show negative covariance, earlier studies demonstrate that each element records Mi-  
337 lankovitch periodicities in intervals where the other does not (Sørensen et al., 2020; Zhao  
338 et al., 2022), indicating that their orbital signals are not only products of dilution or other  
339 non orbital processes.

340 The multichannel result, shown in figure 6, displays a clear improvement in spectral  
341 resolution compared to the single channel analysis in figure 5. High probabilities increase,  
342 low probabilities decrease, and several secondary peaks that previously suggested alternative  
343 solutions are reduced or absent. The information content follows the same general pattern as  
344 before but increases by roughly an order of magnitude when three channels are used instead  
345 of one. The corresponding relative time scale in figure 9 is similar to that in figure 8, but  
346 with greater detail and a slightly longer total duration.

347 These results support the use of high resolution XRF data combined with probabilistic  
348 spectral inversion as a powerful approach for extracting geochronological information from  
349 ancient sedimentary archives.

## 350 4 Discussion

### 351 4.1 Limitations

352 Nonetheless, some limitations must be acknowledged. The assumed orbital target periods  
353 are model-based. While the tuning strategy often relies on the 405 ky eccentricity cycle  
354 as a stable chronometer, potential shifts in Earth’s rotational parameters due to e.g. tidal  
355 dissipation effects could introduce biases.

356 Our algorithm is based on the assumption that prior information about the spectral peak  
357 identification process can be provided, and that it adequately describes the way Milankovitch  
358 periods are identified by human analysts. According to our synthetic tests, and the good  
359 consistency of our Fågeltofta-2 results with results from previous studies, it works well, but it  
360 is advisable to carefully check results obtained in new cases, particularly to what extent they  
361 are compatible with other, independent knowledge about the geological scenario considered.

362 There are also some fundamental assumptions behind Milankovitch analysis that apply to  
363 any method. Milankovitch cycles are (quasi-)periodic, but not sinusoidal. This means that  
364 a hypothetical, noise-free Milankovitch spectrum will, in general, contain spectral compo-  
365 nents outside the main Milankovitch frequencies (Sinnesael et al., 2018). These components  
366 are generally disregarded in Milankovitch analysis programs, including **AstroComb**. More  
367 seriously, the Earth’s sedimentary system is highly nonlinear and is therefore expected to  
368 produce additional periods that are sums and differences of the main Milankovitch cycles.  
369 The amplitudes of such periods could be significant, but they are ignored by our algorithm,  
370 since we are not interested in the amplitudes, only in the wave numbers. An additional prob-  
371 lem with the non-linearity of the sedimentary system is that, even if we know the amplitudes  
372 of the input Milankovitch signal, the output amplitudes observed in boreholes are entirely  
373 unknown. This was the background for the way that we designed our spectral fit algorithm,  
374 (e.g. somewhat agnostic to the amplitude of the recorded periodicities) .

375 Last, but not least, it is important to remember that Milankovitch cycle identification is  
376 a *difficult* problem. The signal-to-noise ratio is generally very low, and the problem is often  
377 similar to finding a needle in a hay stack. Such problems are prone to detrimental human  
378 biases, but **AstroComb** is designed with the aim of quantifying the analysis, and casting the  
379 problem as a probabilistic inference problem, so as to avoid such biases. It generally provides  
380 several plausible solutions for the sedimentation rates at given depths, allowing the user to  
381 choose, based on geological/stratigraphic knowledge.

## 382 4.2 Broader Implications

383 The **AstroComb** algorithm has discovered abrupt changes in sedimentation rate in the Fågeltofta-  
384 2 core making predictions to guide sedimentologist in reconstructing pulses of sedimenta-  
385 tion from geological archives. Sedimentation rate shifts in the Alum shale Formation (incl.  
386 Billegrav-2 and Fågeltofta) are correlated to relative sea level changes obtained from sequence  
387 stratigraphy (Sørensen et al., 2020). Yet, previous sedimentation rate estimates obtained us-  
388 ing eCoco and a smoothing spline fit on visually profound periods in the wavelet spectrum  
389 unavoidably induced some degree of smoothing of the sedimentation rate, which may give a  
390 false impression of the actual sedimentation rate changes. With **AstroComb**, sedimentation  
391 rate changes are not necessarily changing smoothly across stratigraphy.

392 As sedimentation rate is a fundamental parameter characterizing a sedimentary envi-  
393 ronment and a factor that serves as a first order control on organic matter preservation,  
394 **AstroComb** may help engaging sedimentologists with a new relative chronometer. Also, we  
395 envision to use it in combination with geochemical information about sedimentation rate  
396 changes.

## 397 5 Conclusion

398 The algorithm contributes methodologically to the field of deep-time astrochronology by  
399 offering a multi-channel, probabilistic method for estimation of astronomically constrained  
400 timescales. At the same time we offer critical quality control of the data, allowing the user  
401 to evaluate how much Milankovich information can actually be detected in the XRF-derived

402 elemental records. The framework established here provides a robust platform for exploring  
403 the causes and consequences of climatic, geochemical, and evolutionary change in Earth's  
404 early history.

## 405 **6 Code and Data Availability**

406 The exact version of the program used to generate all results in this paper, together with the  
407 input data, the scripts used to run the model, and the scripts used to produce the plots for  
408 all simulations, is available at <https://doi.org/10.5281/zenodo.17966227> under the licence  
409 GNU General Public License v3.0.

## 410 **7 Author Contributions**

411 Iris Fernandes and Klaus Mosegaard led the conceptualization of the study and the devel-  
412 opment of the methodology, including algorithm design, numerical analysis, inverse prob-  
413 lem formulation, and the integration of uncertainty quantification. They implemented the  
414 data processing and analysis pipeline, contributed to the overall methodological design, and  
415 drafted the original manuscript. Tais W. Dahl and Aske Sørensen contributed to the theoret-  
416 ical framework and provided critical input on the geochemical and geological interpretation  
417 and analysis. Mohammad Youssof contributed to algorithm parameterization and optimiza-  
418 tion. Nicholas Thibault contributed with geochronological insights in the analysis. Klaus  
419 Mosegaard and Tais W. Dahl obtained funding for the project.

## 420 **8 Acknowledgments**

421 The authors thank Marie-Louise Siggaard Andersen at the core scanning XRF laboratory at  
422 Globe for discussions on data quality, and Mattis Ring Westergaard for insightful comments  
423 and corrections to the code. Agnete K. H. Abildtrup and Astrid Juel Bojsen-Møller assisted  
424 at the core scanner when evaluating data uncertainty. We acknowledge funding from the  
425 Villum Data Synergy Programme (project no. 50114).

## 426 **References**

- 427 Farhat, M., Auclair-Desrotour, P., Boué, G., and Laskar, J. (2022). The resonant tidal  
428 evolution of the earth–moon distance. *Astronomy Astrophysics*, 665:L1.
- 429 Hays, J. D., Imbrie, J., and Shackleton, N. J. (1976). Variations in the earth's orbit: Pace-  
430 maker of the ice ages. *Science*, 194(4270):1121–1132.
- 431 Herbert, T. D. (1994). Reading orbital signals distorted by sedimentation: models and ex-  
432 amples. In de Boer, P. L. and Smith, D. G., editors, *Orbital Forcing and Cyclic Sequences*,  
433 volume 19 of *Special Publication*, pages 483–507. International Association of Sedimentol-  
434 ogists.

- 435 Hinnov, L. A. (2013). Cyclostratigraphy and its revolutionizing applications in the earth  
436 and planetary sciences. *Geological Society of America Bulletin*, 125(11–12):1703–1734.
- 437 Hoang, N., Laskar, J., Hara, N. C., Wu, Y., Sultanov, A., Sinnesael, M., Westerhold, T.,  
438 and Bujons, P. (2025). Astrogeofit: A genetic algorithm and bayesian approach for the as-  
439 tronomical calibration of the geological timescale. *Paleoceanography and Paleoclimatology*,  
440 40(8):e2024PA005021.
- 441 Kemp, D. B. and Sexton, P. F. (2014). Time-scale uncertainty of abrupt events in the  
442 geologic record arising from unsteady sedimentation. *Geology*, 42(10):891–894.
- 443 Kullback, S. and Leibler, R. A. (1951). On information and sufficiency. *The Annals of*  
444 *Mathematical Statistics*, 22:79–86.
- 445 Laskar, J. (2020). Chapter 4 - astrochronology. In Gradstein, Felix M. Gradstein, J. G. O.  
446 M. D. S. G. M. O., editor, *Geologic Time Scale 2020*, page 139–158. Elsevier, Amsterdam.
- 447 Laskar, J., Fienga, A., Gastineau, M., and Manche, H. (2011). A new orbital solution for  
448 the long-term motion of the earth. *Astronomy Astrophysics*, 532:A89.
- 449 Laskar, J., Robutel, P., Joutel, F., Gastineau, M., Corrêia, A. C. M., and Levrard, B. (2004).  
450 A long-term numerical solution for the insolation quantities of the earth. *Astronomy*  
451 *Astrophysics*, 428(1):261–285.
- 452 Li, M., Kump, L. R., Hinnov, L. A., and Mann, M. E. (2018). Tracking variable sedi-  
453 mentation rates and astronomical forcing in phanerozoic paleoclimate proxy series with  
454 evolutionary correlation coefficients and hypothesis testing. *Earth and Planetary Science*  
455 *Letters*, 501:165–179.
- 456 Ma, C., Meyers, S. R., and Sageman, B. B. (2017). Theory of chaotic orbital variations  
457 confirmed by cretaceous geological evidence. *Nature*, 542:468–470.
- 458 Malinverno, A., Erba, E., and Herbert, T. D. (2010). Orbital tuning as an inverse prob-  
459 lem: Chronology of the early aptian oceanic anoxic event 1a (Selli Level) in the Cismon  
460 APTICORE. *Paleoceanography*, 25(2):PA2203.
- 461 Malinverno, A. and Meyers, S. R. (2024). Bayesian estimation of past astronomical frequen-  
462 cies, lunar distance, and length of day from sediment cycles. *Geochemistry, Geophysics,*  
463 *Geosystems*, 25:e2023GC011176.
- 464 Meyers, S. R. (2015). The evaluation of eccentricity-related amplitude modulation and  
465 bundling in paleoclimate data: An inverse approach for astrochronologic testing and  
466 timescale optimization. *Paleoceanography*, 30(12):1625–1640.
- 467 Meyers, S. R. and Malinverno, A. (2018). Proterozoic milankovitch cycles and the history of  
468 the solar system. *Proceedings of the National Academy of Sciences*, 115(25):1717689115.
- 469 Meyers, S. R., Sageman, B., and Hinnov, L. (2001). Integrated quantitative stratigraphy of  
470 the cenomanian-turonian bridge creek limestone member using evolutive harmonic analysis  
471 and stratigraphic modeling. *Journal of Sedimentary Research*, 71:627–643.

- 472 Meyers, S. R. and Sageman, B. B. (2007). Quantification of deep-time orbital forcing by  
473 average spectral misfit. *American Journal of Science*, 307(5):773–792.
- 474 Munnecke, A., Westphal, H., Elrick, M., and Reijmer, J. J. G. (2001). The mineralogical  
475 composition of precursor sediments of calcareous rhythmites: A new approach. *Internation-*  
476 *ational Journal of Earth Sciences*, 90(4):795–812.
- 477 Pälke, H., Norris, R. D., Herrle, J. O., Wilson, P. A., Coxall, H. K., Lear, C. H., Shackleton,  
478 N. J., Tripathi, A. K., and Wade, B. S. (2006). The heartbeat of the oligocene climate  
479 system. *Science*, 314:1894–1898.
- 480 Paola, C. (2016). A mind of their own: Recent advances in autogenic dynamics in rivers and  
481 deltas. *SEPM Special Publications*, 106:5–17.
- 482 Peng, C., Zou, C., Wu, H., Zhang, S., Kouamelan, K. S., and Wang, C. (2023). Evaluating  
483 geophysical logs as proxies for cyclostratigraphy in lacustrine deposits using power ratio  
484 accumulation. *Palaeogeography, Palaeoclimatology, Palaeoecology*, 614:111428.
- 485 Ripepe, M. and Fischer, A. G. (1991). Stratigraphic rhythms synthesized from orbital vari-  
486 ations. In Franseen, E. K., Watney, W. L., Kendall, C. G. S. C., and Ross, W., editors,  
487 *Sedimentary Modeling*. Kansas Geological Survey.
- 488 Schiffelbein, P. and Dorman, L. (1986). Spectral effects of time–depth nonlinearities in deep  
489 sea sediment records: a demodulation technique for realigning time and depth scales.  
490 *Journal of Geophysical Research*, 91:3821–3835.
- 491 Sinnesael, M., Zivanovic, M., De Vleeschouwer, D., and Claeys, P. (2018). Spectral moments  
492 in cyclostratigraphy: Advantages and disadvantages compared to more classic approaches.  
493 *Paleoceanography and Paleoclimatology*, 33(5):493–510.
- 494 Sinnesael, M., Zivanovic, M., De Vleeschouwer, D., Claeys, P., and Schoukens, J. (2016).  
495 Astronomical component estimation (ace v.1) by time-variant sinusoidal modeling. *Geo-*  
496 *scientific Model Development*, 9(10):3517–3531.
- 497 Sørensen, A. L., Nielsen, A. T., Thibault, N., Zhao, Z., Schovsbo, N. H., and Dahl, T. W.  
498 (2020). Astronomically forced climate change in the late cambrian. *Earth and Planetary*  
499 *Science Letters*, 548:116475.
- 500 Trayler, R. B., Meyers, S. R., Sageman, B. B., and Schmitz, M. D. (2024). Bayesian inte-  
501 gration of astrochronology and radioisotope geochronology. *Geochronology*, 6:107–123.
- 502 Waltham, D. (2015). Milankovitch period uncertainties and their impact on cyclostratigra-  
503 phy. *Journal of Sedimentary Research*, 85:990–998.
- 504 Zhao, Z., Pang, X., Zou, C., Dickson, A. J., Basu, A., Guo, Z., Pan, S., Nielsen, A. T.,  
505 Schovsbo, N. H., Jing, Z., and Dahl, T. W. (2023). Dynamic oceanic redox conditions  
506 across the late cambrian spice event constrained by molybdenum and uranium isotopes.  
507 *Earth and Planetary Science Letters*, 604:118013.

- 508 Zhao, Z., Thibault, N. R., Dahl, T. W., Schovsbo, N. H., Sørensen, A. L., Rasmussen, C.  
509 M. , and Nielsen, A. T. (2022). Synchronizing rock clocks in the late cambrian. *Nature*  
510 *Communications*, 13:1990.
- 511 Zhou, Z., Meyers, S. R., Maloof, A. C., Li, M., et al. (2024). Earth–moon dynamics from  
512 cyclostratigraphy reveals possible ocean tide resonance in the mesoproterozoic era. *Science*  
513 *Advances*, 10(50):e adn7674.
